# Supplementary material for: Digital droplet PCR accurately quantifies SARS-CoV-2 viral load from crude lysate without nucleic acid purification
Source: Sci Rep. 2021 Jan 12;11:780. doi: 10.1038/s41598-020-80715-1 (PMC7804156; doi:10.1038/s41598-020-80715-1)
Supplement: Supplementary file 1 — Supplementary Information. [file 41598_2020_80715_MOESM1_ESM.docx]

Title: Digital droplet PCR accurately quantifies SARS-CoV-2 viral load from crude lysate without nucleic acid purification

**Authors:** Harish N. Vasudevan,a,b,* Peng Xu,a,* Venice Servellita,c,d Steve Miller,c Leqian Liu,a Allan Gopez,c Charles Y. Chiu,c,d,e Adam R. Abatea,f,#

**Affiliations**

aDepartment of Bioengineering and Therapeutic Sciences, University of California San Francisco, CA, USA

bDepartment of Radiation Oncology, University of California San Francisco, CA, USA

cDepartment of Laboratory Medicine, University of California San Francisco, CA, USA

dUCSF-Abbott Viral ﻿Diagnostics and Discovery Center, San Francisco, CA, USA

eDepartment of Medicine, Division of Infectious Diseases, University of California San Francisco, CA, USA

fChan Zuckerberg Biohub, San Francisco, California, USA

* These authors contributed equally to this study.

**Corresponding Author**

#Adam R. Abate, Ph.D.

Department of Bioengineering and Therapeutic Sciences, University of California, San Francisco, 1700 4th St, San Francisco, California, USA

Email: [adam@abatelab.org](mailto:adam@abatelab.org)

**Supplementary Figures.**

**
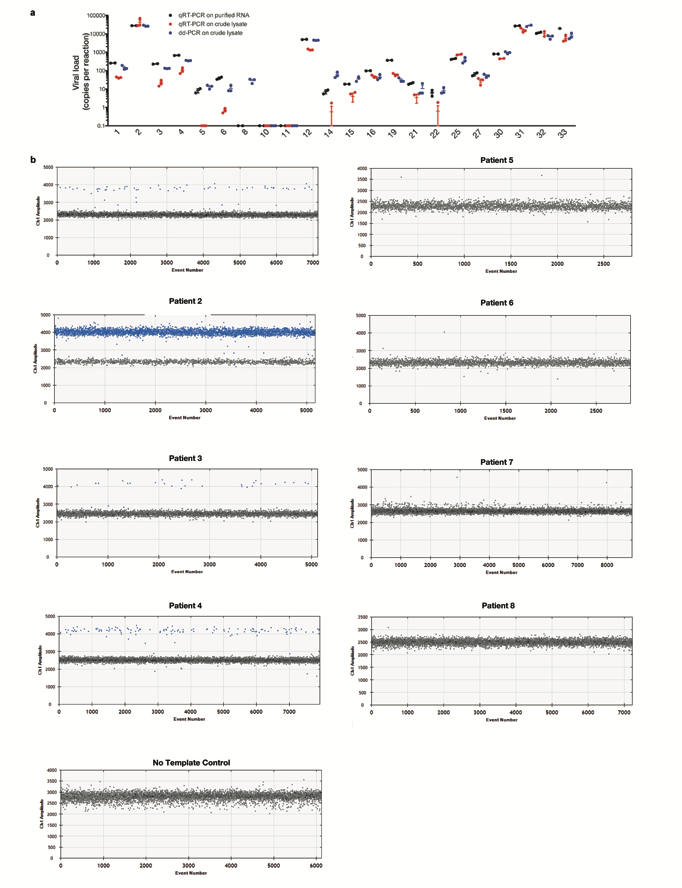
**

**Supplemental Figure 1.** (a) Fluorescence intensities as measured by BioRad QX200 Droplet Reader for example clinical nasopharyngeal patient samples 1-8 and a SeraCare no template control. (b) Absolute quantification by ddPCR from crude lysate show strong concordance with qRT-PCR from purified RNA in contrast to qRT-PCR from crude lysate (n=22 samples).
